# Supplementary material for: Risk of Injuries around Diagnosis of Cervical Cancer and Its Precursor Lesions: A Nationwide Cohort Study in Sweden
Source: Oxford University Press journal article supplement (doi:10.1158/1055-9965.epi-20-0673), 2020-10-21
Supplement: 10559965epi200673-sup-242712_3_supp_6456314_q85qg8.docx [file 10559965epi200673-sup-242712_3_supp_6456314_q85qg8.docx]

**Risk of Injuries around Diagnosis of Cervical Cancer and Its Precursor Lesions: A Nationwide Cohort Study in Sweden**

**Supplementary table**

**Table S2. Incidence rates (IRs, per 1 000 person-months) of iatrogenic and non-iatrogenic injuries during cervical diagnostic workups, by injury subtypes, a nationwide cohort study in Sweden, 2001-2012**

|  | Normal smear† | | CIN1 | | CIN2 | | CIN3/AIS‡ | | Invasive cancer | |
| --- | --- | --- | --- | --- | --- | --- | --- | --- | --- | --- |
|  | No. | Crude IR | No. | Crude IR | No. | Crude IR | No. | Crude IR | No. | Crude IR |
| Iatrogenic injury |  |  |  |  |  |  |  |  |  |  |
| Drug or biological substances | 26 | 0.01 | 4 | 0.02 | 2 | 0.01 | 0 | 0.00 | 0 | 0.00 |
| Medical procedures and care | 76 | 0.02 | 7 | 0.03 | 4 | 0.02 | 17 | 0.09 | 8 | 0.58 |
| Non-iatrogenic injury |  |  |  |  |  |  |  |  |  |  |
| Unintentional | 425 | 0.11 | 28 | 0.13 | 21 | 0.13 | 27 | 0.14 | 9 | 0.65 |
| Intentional | 18 | 0.00 | 1 | 0.00 | 1 | 0.01 | 1 | 0.01 | 0 | 0.00 |
| Undetermined nature | 15 | 0.00 | 0 | 0.00 | 3 | 0.02 | 0 | 0.00 | 0 | 0.00 |

† Normal smear: a 2-month period starting from the day of smear for women with normal smear.

‡ CIN3/AIS includes cervical intraepithelial neoplasia grade 3 and adenocarcinoma *in situ*.
