# Supplementary material for: Risk of Injuries around Diagnosis of Cervical Cancer and Its Precursor Lesions: A Nationwide Cohort Study in Sweden
Source: Oxford University Press journal article supplement (doi:10.1158/1055-9965.epi-20-0673), 2020-10-21
Supplement: 10559965epi200673-sup-242712_3_supp_6456317_q35qg3.docx [file 10559965epi200673-sup-242712_3_supp_6456317_q35qg3.docx]

**Risk of Injuries around Diagnosis of Cervical Cancer and Its Precursor Lesions: A Nationwide Cohort Study in Sweden**

**Supplementary table**

Table S4. Incidence rates (IRs, per 1 000 person-months) and incidence rate ratios (IRRs) of non-iatrogenic injuries during the diagnostic workup of women with cervical cancer and its precursor lesions, compared to women with normal smear, a nationwide cohort study during 2001-2012 in Sweden, accounting for one injury event per woman

|  | **No. of women** | **No. of events** | **Crude IRs** | **IRR (95% CI)** |
| --- | --- | --- | --- | --- |
| **Non-iatrogenic injuries that required at least one day of hospital admission** | | | | |
| Normal smear† | 1 853 510 | 446 | 0.12 | 1.0 |
| CIN1 | 22 435 | 23 | 0.11 | 0.82 (0.54-1.27) |
| CIN2 | 20 692 | 23 | 0.14 | 1.07 (0.70-1.65) |
| CIN3/AIS‡ | 36 542 | 26 | 0.13 | 0.94 (0.63-1.41) |
| Invasive cancer | 5 189 | 8 | 0.58 | 2.33 (1.17-4.63) |

† Normal smear: a 2-month period starting from the day of smear for women with normal smear.

‡ CIN3/AIS includes cervical intraepithelial neoplasia grade 3 and adenocarcinoma *in situ*.
